# Supplementary material
Source: ML conference proceedings conference paper supplement (https://openreview.net/forum?id=ANJuNDFdvP)
Supplement: supplementary_material [file attachment]

# Supplementary Files For UniFolding: Towards Sample-efficient, Scalable, and Generalizable Robotic Garment Folding

Anonymous Author(s)

Affiliation

Address

email

## 1 Evidence of Human Preferences in *fling* Action

2 Fig. 1 and Fig. 2 show grasping point distribution (showed in NOCS[1] space) of human demonstra-  
3 tion data collected by VR. We can see that humans frequently grasp shoulders, collars, and waists  
4 in the earlier stage of the unfolding process when the garment is usually more crumpled. Humans  
5 will probably grasp shoulders at the later stage of the unfolding process when the garment is more  
6 flattened and recognizable.

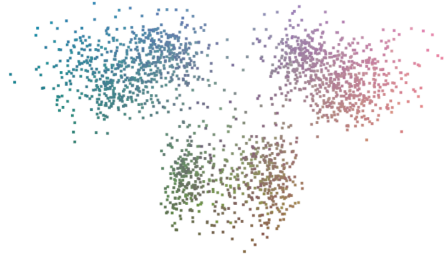

Figure 1: The grasping point distribution (showed in NOCS[1] space) for *fling* action in human demonstration data through VR. These points are from **earlier** steps of the unfolding process.

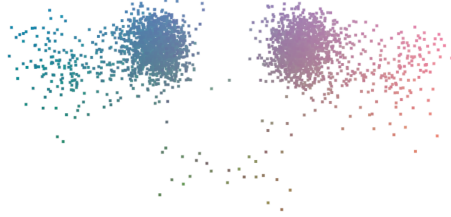

Figure 2: The grasping point distribution (showed in NOCS[1] space) for *fling* action in human demonstration data through VR. These points are from **later** steps of the unfolding process.

## 7 2 How $R_C$ and $R_A$ are Calculated

8 Intuitively speaking,  $R_C$  encourages actions that make the garment more flattened and more similar  
9 to the canonical pose, and  $R_A$  encourages actions that make the garment more aligned with the

target pose in planar position and rotation. Please refer to ClothFunnels[2] for the detailed definition of  $R_C$  and  $R_A$ .

### 3 Details of Human Demonstration Data Collection in VR

**VR Recording System** We build a real-time data recording system for collecting human demonstration data for garment manipulation in Virtual Reality. This system is based on the VR-Garment system implemented in GarmentTracking[3]. It is driven by Unity, and the physics engine for cloth simulation is based on Obi. In practice, this system can effectively collect large amounts of human demonstration data for thousands of garments with different shapes and sizes.

**Data Recording Pipeline** The data recording pipeline is similar to that in GarmentTracking[3]. Firstly, the volunteer will put on an HTC Vive Pro VR Headset and VRTRIX VR gloves. Secondly, a virtual garment from CLOTH3D[4] dataset will randomly drop on the table in virtual space. Thirdly, the volunteer will use his hands to perform the action primitives defined in the main paper for multiple steps to fully smooth and fold the garment. On average, the whole multi-step manipulation process for one garment only takes about 20s in VR.

**Data Post-processing** The raw data generated by the data recording pipeline are videos that contain the garment mesh vertices and hand poses of each frame. We use a simple method to automatically convert hand poses into robot gripper poses, please see the supplementary files for more details. After data recording, We will perform the following data post-processing steps to generate data that are available for network training: Firstly, we automatically divide the whole video of the garment manipulation process into multiple valid action intervals. The start and ending of each action interval are decided by the grasping and releasing states of both human hands. Secondly, we use simple rules to automatically generate labels of action primitive type for all valid action intervals based on patterns of human actions. Thirdly, we re-render the garment mesh in Unity and generate RGB-D image, mask, NOCS[1] map, and gripper poses for the starting frame of each action interval.

### 4 Details of Human Preference Annotation and Learning

In practice, we generate 8 comparisons from selected keypoint candidates with a fixed threshold  $R_{CA} > c$  for each data sample, which can filter out most of the bad keypoint candidates. We invite two volunteers to annotate the same data samples and drop those annotations where two volunteers do not agree, which can increase data annotation quality.

### 5 Keypoint Prediction for *fling* action

The dense features generated by the Transformer model will be used for the pose prediction branch for fling action. This branch will predict two grasp points for *fling* action. The grasp point indicates the location on the garment where the robot should grip and perform the flinging action.

**Keypoint Candidate Prediction** After analyzing the statistics of human demonstration data in VR, we find that humans will frequently grasp recognizable keypoints on the garment (e.g. cuff, shoulder, waist) for fling action (please see the supplementary file for more details). Motivated by this observation, we choose to directly learn possible keypoint candidates purely from human demonstration data. However, the distribution of these keypoint candidates on the garment is multi-modal, so we firstly predict  $K$  possible keypoint candidates  $\mathcal{P} = \{P_1, \dots, P_K\}$ , then supervise them with the variety (Minimum-over-N) loss[5] in Eq. 1:

$$L_{kp}(\mathcal{P}, P^*) = \min_{\{P_1, \dots, P_K\} \in \mathcal{P}} \{d(P^*, P_1), d(P^*, P_2), \dots, d(P^*, P_K)\} \quad (1)$$

where  $P^*$  is the ground-truth keypoint, and  $d(\cdot, \cdot)$  is the distance metric. Intuitively,  $L_{kp}$  only supervises the predicted keypoint closet to the ground-truth keypoint, which encourages the variety

of the  $K$  predicted keypoints. For fling action, we have two ground-truth keypoints  $\{\mathbf{P}_{left}^*, \mathbf{P}_{right}^*\}$  for dual-arm robots, so the final loss is shown in Eq. 2:

$$L_{kp}(\mathcal{P}, \mathbf{P}_{left}^*, \mathbf{P}_{right}^*) = (L_{kp}(\mathcal{P}, \mathbf{P}_{left}^*) + L_{kp}(\mathcal{P}, \mathbf{P}_{right}^*)) / 2 \quad (2)$$

As for the prediction of keypoint candidates  $\mathcal{P}$ , an intuitive way is to use attention-based offset voting[] to directly regress keypoints in 3D task space (the coordinate frame of the input point cloud) as shown in Eq. 3:

$$\mathbf{P}_j = \frac{1}{N} \sum_{i=1}^N a_{i,j} (\mathbf{x}_i + \mathbf{o}_{i,j}), \quad s.t. \sum_{i=1}^N a_{i,j} = 1 \quad (3)$$

where  $\mathbf{P}_j$  is the  $j$ -th keypoint prediction,  $a_{i,j} \in [0, 1]$  is the attention score,  $\mathbf{x}_i \in \mathbf{X}$  is the  $i$ -th point in the input point cloud  $\mathbf{X}$ , and  $\mathbf{o}_{i,j}$  is the 3D offsets of the  $j$ -th keypoint  $\mathbf{P}_j$  relative to the  $i$ -th point  $\mathbf{x}_i$ . The attention score  $a_{i,j}$  and offsets  $\mathbf{o}_{i,j}$  are predicted by MLP with dense features generated by Transformer as input.

**Prediction in Canonical Space** In practice, we find that regressing keypoint candidates in canonical space (Normalized Object Coordinate Space, NOCS[1]) is much easier than regressing them directly in task space. So we additionally predict per-point NOCS coordinate  $\mathbf{c}_i \in \mathcal{C}$  for the input point cloud with dense features generated by the Transformer. Due to the bilateral symmetry property of most garments, we use the symmetric Huber loss defined in Eq. 4 to supervise NOCS prediction  $\mathcal{C}$ :

$$L_{nocs}(\mathcal{C}, \mathcal{C}^*) = \min \left\{ \frac{1}{N} \sum_{i=1, \dots, N} \text{Huber}(\mathbf{c}_i, \mathbf{c}_i^*), \frac{1}{N} \sum_{i=1, \dots, N} \text{Huber}(\mathbf{c}_i, \mathbf{c}_i^{*sym}) \right\} \quad (4)$$

where  $\mathbf{c}_i^* \in \mathcal{C}^*$  is the original ground-truth NOCS coordinate of  $i$ -th point, and  $\mathbf{c}_i^{*sym}$  is the symmetrical ground-truth NOCS target of  $i$ -th point.

Then we can modify Eq. 3 by replacing  $\mathbf{x}_i$  with  $\mathbf{c}_i$  to generate  $K$  keypoint predictions  $\mathcal{P}^{nocs}$  in canonical space instead of task space, which is shown in Eq. 5:

$$\mathbf{P}_j^{nocs} = \frac{1}{N} \sum_{i=1}^N a_{i,j} (\mathbf{c}_i + \mathbf{o}_{i,j}), \quad s.t. \sum_{i=1}^N a_{i,j} = 1 \quad (5)$$

Nextly, we need to find the corresponding 3D location  $\mathbf{P}_j$  in task space for  $j$ -th keypoint from NOCS coordinate  $\mathbf{P}_j^{nocs}$  in canonical space. Due to the local similarity of the NOCS coordinates, we can calculate  $\mathbf{P}_j$  by weighted sum defined in Eq. 6:

$$\mathbf{P}_j = \frac{\sum_{i=1}^N w_{i,j} \mathbf{x}_i}{\sum_{i=1}^N w_{i,j}}, \quad w_{i,j} = \exp(-\alpha \cdot \|\mathbf{P}_j^{nocs} - \mathbf{c}_i\|_2) \quad (6)$$

Intuitively,  $w_{i,j}$  is the weight based on the L2-distance between  $j$ -th keypoint  $\mathbf{P}_j^{nocs}$  and  $i$ -th point  $\mathbf{c}_i$  in canonical space. The larger  $w_{i,j}$  is, the more likely  $j$ -th keypoint  $\mathbf{P}_j$  is closer to the  $i$ -th point  $\mathbf{x}_i$  in task space. We set  $\alpha = 50$  by default.

Finally, we can supervise  $K$  keypoint candidate predictions both in canonical space and task space by Eq. 7:

$$L_{kp.all}(\mathcal{P}^{nocs}, \mathcal{P}, \mathbf{P}^{*nocs}, \mathbf{P}^*) = L_{kp}(\mathcal{P}^{nocs}, \mathbf{P}^{*nocs}) + L_{kp}(\mathcal{P}, \mathbf{P}^*) \quad (7)$$

## 6 Additional Garment Details

This section presents the parameters of the garments that are used in our experiment. We use a total of 60 garments, divided into two sets: a test set of 10 long-sleeved and 10 short-sleeved garments, and a training set of 20 long-sleeved and 20 short-sleeved garments. The garments cover various materials and textures. Each garment is assigned a unique ID, and its size and material are also listed

84 in the table. The size information indicates the height and width of the garment when fully unfolded.  
85 In addition, we capture an RGB image of each garment from a top-down view.

|                                                                                                                                |   |   |   |     |       |           |  |        |        |                                                                                                                                                                                                                    |     |           |                                                                                                                                                              |     |       |           |     |        |        |  |        |           |                                                                                                                                                                                                                    |     |      |          |     |       |           |  |        |        |                                                                                                                                                                    |     |         |                                                                                                                                                                         |     |      |          |     |        |           |  |        |        |
|------------------------------------------------------------------------------------------------------------------------------------------------------------------------------------------------------------------|-------------------------------------------------------------------------------------|--------------------------------------------------------------------------------------|---------------------------------------------------------------------------------------|-----|-------|-----------|--|--------|--------|--------------------------------------------------------------------------------------------------------------------------------------------------------------------------------------------------------------------|-----|-----------|--------------------------------------------------------------------------------------------------------------------------------------------------------------|-----|-------|-----------|-----|--------|--------|--|--------|-----------|--------------------------------------------------------------------------------------------------------------------------------------------------------------------------------------------------------------------|-----|------|----------|-----|-------|-----------|--|--------|--------|--------------------------------------------------------------------------------------------------------------------------------------------------------------------|-----|---------|-------------------------------------------------------------------------------------------------------------------------------------------------------------------------|-----|------|----------|-----|--------|-----------|--|--------|--------|
| <table><tr><th>No.</th><th>Size</th><th>Material</th></tr><tr><td>001</td><td>60 cm</td><td>Nylon</td></tr><tr><td></td><td>145 cm</td><td>Cotton</td></tr><tr><td></td><td></td><td>Polyester</td></tr></table> | No.                                                                                 | Size                                                                                 | Material                                                                              | 001 | 60 cm | Nylon     |  | 145 cm | Cotton |                                                                                                                                                                                                                    |     | Polyester | <table><tr><th>No.</th><th>Size</th><th>Material</th></tr><tr><td>002</td><td>58 cm</td><td>Wool</td></tr><tr><td></td><td>121 cm</td><td></td></tr></table> | No. | Size  | Material  | 002 | 58 cm  | Wool   |  | 121 cm |           | <table><tr><th>No.</th><th>Size</th><th>Material</th></tr><tr><td>003</td><td>55 cm</td><td>Polyester</td></tr><tr><td></td><td>123 cm</td><td>Cotton</td></tr><tr><td></td><td></td><td>Spandex</td></tr></table> | No. | Size | Material | 003 | 55 cm | Polyester |  | 123 cm | Cotton |                                                                                                                                                                    |     | Spandex | <table><tr><th>No.</th><th>Size</th><th>Material</th></tr><tr><td>004</td><td>53 cm</td><td>Polyester</td></tr><tr><td></td><td>126 cm</td><td>Cotton</td></tr></table> | No. | Size | Material | 004 | 53 cm  | Polyester |  | 126 cm | Cotton |
| No.                                                                                                                                                                                                              | Size                                                                                | Material                                                                             |                                                                                       |     |       |           |  |        |        |                                                                                                                                                                                                                    |     |           |                                                                                                                                                              |     |       |           |     |        |        |  |        |           |                                                                                                                                                                                                                    |     |      |          |     |       |           |  |        |        |                                                                                                                                                                    |     |         |                                                                                                                                                                         |     |      |          |     |        |           |  |        |        |
| 001                                                                                                                                                                                                              | 60 cm                                                                               | Nylon                                                                                |                                                                                       |     |       |           |  |        |        |                                                                                                                                                                                                                    |     |           |                                                                                                                                                              |     |       |           |     |        |        |  |        |           |                                                                                                                                                                                                                    |     |      |          |     |       |           |  |        |        |                                                                                                                                                                    |     |         |                                                                                                                                                                         |     |      |          |     |        |           |  |        |        |
|                                                                                                                                                                                                                  | 145 cm                                                                              | Cotton                                                                               |                                                                                       |     |       |           |  |        |        |                                                                                                                                                                                                                    |     |           |                                                                                                                                                              |     |       |           |     |        |        |  |        |           |                                                                                                                                                                                                                    |     |      |          |     |       |           |  |        |        |                                                                                                                                                                    |     |         |                                                                                                                                                                         |     |      |          |     |        |           |  |        |        |
|                                                                                                                                                                                                                  |                                                                                     | Polyester                                                                            |                                                                                       |     |       |           |  |        |        |                                                                                                                                                                                                                    |     |           |                                                                                                                                                              |     |       |           |     |        |        |  |        |           |                                                                                                                                                                                                                    |     |      |          |     |       |           |  |        |        |                                                                                                                                                                    |     |         |                                                                                                                                                                         |     |      |          |     |        |           |  |        |        |
| No.                                                                                                                                                                                                              | Size                                                                                | Material                                                                             |                                                                                       |     |       |           |  |        |        |                                                                                                                                                                                                                    |     |           |                                                                                                                                                              |     |       |           |     |        |        |  |        |           |                                                                                                                                                                                                                    |     |      |          |     |       |           |  |        |        |                                                                                                                                                                    |     |         |                                                                                                                                                                         |     |      |          |     |        |           |  |        |        |
| 002                                                                                                                                                                                                              | 58 cm                                                                               | Wool                                                                                 |                                                                                       |     |       |           |  |        |        |                                                                                                                                                                                                                    |     |           |                                                                                                                                                              |     |       |           |     |        |        |  |        |           |                                                                                                                                                                                                                    |     |      |          |     |       |           |  |        |        |                                                                                                                                                                    |     |         |                                                                                                                                                                         |     |      |          |     |        |           |  |        |        |
|                                                                                                                                                                                                                  | 121 cm                                                                              |                                                                                      |                                                                                       |     |       |           |  |        |        |                                                                                                                                                                                                                    |     |           |                                                                                                                                                              |     |       |           |     |        |        |  |        |           |                                                                                                                                                                                                                    |     |      |          |     |       |           |  |        |        |                                                                                                                                                                    |     |         |                                                                                                                                                                         |     |      |          |     |        |           |  |        |        |
| No.                                                                                                                                                                                                              | Size                                                                                | Material                                                                             |                                                                                       |     |       |           |  |        |        |                                                                                                                                                                                                                    |     |           |                                                                                                                                                              |     |       |           |     |        |        |  |        |           |                                                                                                                                                                                                                    |     |      |          |     |       |           |  |        |        |                                                                                                                                                                    |     |         |                                                                                                                                                                         |     |      |          |     |        |           |  |        |        |
| 003                                                                                                                                                                                                              | 55 cm                                                                               | Polyester                                                                            |                                                                                       |     |       |           |  |        |        |                                                                                                                                                                                                                    |     |           |                                                                                                                                                              |     |       |           |     |        |        |  |        |           |                                                                                                                                                                                                                    |     |      |          |     |       |           |  |        |        |                                                                                                                                                                    |     |         |                                                                                                                                                                         |     |      |          |     |        |           |  |        |        |
|                                                                                                                                                                                                                  | 123 cm                                                                              | Cotton                                                                               |                                                                                       |     |       |           |  |        |        |                                                                                                                                                                                                                    |     |           |                                                                                                                                                              |     |       |           |     |        |        |  |        |           |                                                                                                                                                                                                                    |     |      |          |     |       |           |  |        |        |                                                                                                                                                                    |     |         |                                                                                                                                                                         |     |      |          |     |        |           |  |        |        |
|                                                                                                                                                                                                                  |                                                                                     | Spandex                                                                              |                                                                                       |     |       |           |  |        |        |                                                                                                                                                                                                                    |     |           |                                                                                                                                                              |     |       |           |     |        |        |  |        |           |                                                                                                                                                                                                                    |     |      |          |     |       |           |  |        |        |                                                                                                                                                                    |     |         |                                                                                                                                                                         |     |      |          |     |        |           |  |        |        |
| No.                                                                                                                                                                                                              | Size                                                                                | Material                                                                             |                                                                                       |     |       |           |  |        |        |                                                                                                                                                                                                                    |     |           |                                                                                                                                                              |     |       |           |     |        |        |  |        |           |                                                                                                                                                                                                                    |     |      |          |     |       |           |  |        |        |                                                                                                                                                                    |     |         |                                                                                                                                                                         |     |      |          |     |        |           |  |        |        |
| 004                                                                                                                                                                                                              | 53 cm                                                                               | Polyester                                                                            |                                                                                       |     |       |           |  |        |        |                                                                                                                                                                                                                    |     |           |                                                                                                                                                              |     |       |           |     |        |        |  |        |           |                                                                                                                                                                                                                    |     |      |          |     |       |           |  |        |        |                                                                                                                                                                    |     |         |                                                                                                                                                                         |     |      |          |     |        |           |  |        |        |
|                                                                                                                                                                                                                  | 126 cm                                                                              | Cotton                                                                               |                                                                                       |     |       |           |  |        |        |                                                                                                                                                                                                                    |     |           |                                                                                                                                                              |     |       |           |     |        |        |  |        |           |                                                                                                                                                                                                                    |     |      |          |     |       |           |  |        |        |                                                                                                                                                                    |     |         |                                                                                                                                                                         |     |      |          |     |        |           |  |        |        |
|                                                                                                                               |  |  |  |     |       |           |  |        |        |                                                                                                                                                                                                                    |     |           |                                                                                                                                                              |     |       |           |     |        |        |  |        |           |                                                                                                                                                                                                                    |     |      |          |     |       |           |  |        |        |                                                                                                                                                                    |     |         |                                                                                                                                                                         |     |      |          |     |        |           |  |        |        |
| <table><tr><th>No.</th><th>Size</th><th>Material</th></tr><tr><td>005</td><td>73 cm</td><td>Polyester</td></tr><tr><td></td><td>128 cm</td><td>Cotton</td></tr></table>                                          | No.                                                                                 | Size                                                                                 | Material                                                                              | 005 | 73 cm | Polyester |  | 128 cm | Cotton | <table><tr><th>No.</th><th>Size</th><th>Material</th></tr><tr><td>006</td><td>50 cm</td><td>Polyester</td></tr><tr><td></td><td>133 cm</td><td>Cotton</td></tr><tr><td></td><td></td><td>Spandex</td></tr></table> | No. | Size      | Material                                                                                                                                                     | 006 | 50 cm | Polyester |     | 133 cm | Cotton |  |        | Spandex   | <table><tr><th>No.</th><th>Size</th><th>Material</th></tr><tr><td>007</td><td>55 cm</td><td>Viscose</td></tr><tr><td></td><td>123 cm</td><td>Cotton</td></tr></table>                                              | No. | Size | Material | 007 | 55 cm | Viscose   |  | 123 cm | Cotton | <table><tr><th>No.</th><th>Size</th><th>Material</th></tr><tr><td>008</td><td>80cm</td><td>Linen</td></tr><tr><td></td><td>131 cm</td><td>Cotton</td></tr></table> | No. | Size    | Material                                                                                                                                                                | 008 | 80cm | Linen    |     | 131 cm | Cotton    |  |        |        |
| No.                                                                                                                                                                                                              | Size                                                                                | Material                                                                             |                                                                                       |     |       |           |  |        |        |                                                                                                                                                                                                                    |     |           |                                                                                                                                                              |     |       |           |     |        |        |  |        |           |                                                                                                                                                                                                                    |     |      |          |     |       |           |  |        |        |                                                                                                                                                                    |     |         |                                                                                                                                                                         |     |      |          |     |        |           |  |        |        |
| 005                                                                                                                                                                                                              | 73 cm                                                                               | Polyester                                                                            |                                                                                       |     |       |           |  |        |        |                                                                                                                                                                                                                    |     |           |                                                                                                                                                              |     |       |           |     |        |        |  |        |           |                                                                                                                                                                                                                    |     |      |          |     |       |           |  |        |        |                                                                                                                                                                    |     |         |                                                                                                                                                                         |     |      |          |     |        |           |  |        |        |
|                                                                                                                                                                                                                  | 128 cm                                                                              | Cotton                                                                               |                                                                                       |     |       |           |  |        |        |                                                                                                                                                                                                                    |     |           |                                                                                                                                                              |     |       |           |     |        |        |  |        |           |                                                                                                                                                                                                                    |     |      |          |     |       |           |  |        |        |                                                                                                                                                                    |     |         |                                                                                                                                                                         |     |      |          |     |        |           |  |        |        |
| No.                                                                                                                                                                                                              | Size                                                                                | Material                                                                             |                                                                                       |     |       |           |  |        |        |                                                                                                                                                                                                                    |     |           |                                                                                                                                                              |     |       |           |     |        |        |  |        |           |                                                                                                                                                                                                                    |     |      |          |     |       |           |  |        |        |                                                                                                                                                                    |     |         |                                                                                                                                                                         |     |      |          |     |        |           |  |        |        |
| 006                                                                                                                                                                                                              | 50 cm                                                                               | Polyester                                                                            |                                                                                       |     |       |           |  |        |        |                                                                                                                                                                                                                    |     |           |                                                                                                                                                              |     |       |           |     |        |        |  |        |           |                                                                                                                                                                                                                    |     |      |          |     |       |           |  |        |        |                                                                                                                                                                    |     |         |                                                                                                                                                                         |     |      |          |     |        |           |  |        |        |
|                                                                                                                                                                                                                  | 133 cm                                                                              | Cotton                                                                               |                                                                                       |     |       |           |  |        |        |                                                                                                                                                                                                                    |     |           |                                                                                                                                                              |     |       |           |     |        |        |  |        |           |                                                                                                                                                                                                                    |     |      |          |     |       |           |  |        |        |                                                                                                                                                                    |     |         |                                                                                                                                                                         |     |      |          |     |        |           |  |        |        |
|                                                                                                                                                                                                                  |                                                                                     | Spandex                                                                              |                                                                                       |     |       |           |  |        |        |                                                                                                                                                                                                                    |     |           |                                                                                                                                                              |     |       |           |     |        |        |  |        |           |                                                                                                                                                                                                                    |     |      |          |     |       |           |  |        |        |                                                                                                                                                                    |     |         |                                                                                                                                                                         |     |      |          |     |        |           |  |        |        |
| No.                                                                                                                                                                                                              | Size                                                                                | Material                                                                             |                                                                                       |     |       |           |  |        |        |                                                                                                                                                                                                                    |     |           |                                                                                                                                                              |     |       |           |     |        |        |  |        |           |                                                                                                                                                                                                                    |     |      |          |     |       |           |  |        |        |                                                                                                                                                                    |     |         |                                                                                                                                                                         |     |      |          |     |        |           |  |        |        |
| 007                                                                                                                                                                                                              | 55 cm                                                                               | Viscose                                                                              |                                                                                       |     |       |           |  |        |        |                                                                                                                                                                                                                    |     |           |                                                                                                                                                              |     |       |           |     |        |        |  |        |           |                                                                                                                                                                                                                    |     |      |          |     |       |           |  |        |        |                                                                                                                                                                    |     |         |                                                                                                                                                                         |     |      |          |     |        |           |  |        |        |
|                                                                                                                                                                                                                  | 123 cm                                                                              | Cotton                                                                               |                                                                                       |     |       |           |  |        |        |                                                                                                                                                                                                                    |     |           |                                                                                                                                                              |     |       |           |     |        |        |  |        |           |                                                                                                                                                                                                                    |     |      |          |     |       |           |  |        |        |                                                                                                                                                                    |     |         |                                                                                                                                                                         |     |      |          |     |        |           |  |        |        |
| No.                                                                                                                                                                                                              | Size                                                                                | Material                                                                             |                                                                                       |     |       |           |  |        |        |                                                                                                                                                                                                                    |     |           |                                                                                                                                                              |     |       |           |     |        |        |  |        |           |                                                                                                                                                                                                                    |     |      |          |     |       |           |  |        |        |                                                                                                                                                                    |     |         |                                                                                                                                                                         |     |      |          |     |        |           |  |        |        |
| 008                                                                                                                                                                                                              | 80cm                                                                                | Linen                                                                                |                                                                                       |     |       |           |  |        |        |                                                                                                                                                                                                                    |     |           |                                                                                                                                                              |     |       |           |     |        |        |  |        |           |                                                                                                                                                                                                                    |     |      |          |     |       |           |  |        |        |                                                                                                                                                                    |     |         |                                                                                                                                                                         |     |      |          |     |        |           |  |        |        |
|                                                                                                                                                                                                                  | 131 cm                                                                              | Cotton                                                                               |                                                                                       |     |       |           |  |        |        |                                                                                                                                                                                                                    |     |           |                                                                                                                                                              |     |       |           |     |        |        |  |        |           |                                                                                                                                                                                                                    |     |      |          |     |       |           |  |        |        |                                                                                                                                                                    |     |         |                                                                                                                                                                         |     |      |          |     |        |           |  |        |        |
|                                                                                                                               |  |                                                                                      |                                                                                       |     |       |           |  |        |        |                                                                                                                                                                                                                    |     |           |                                                                                                                                                              |     |       |           |     |        |        |  |        |           |                                                                                                                                                                                                                    |     |      |          |     |       |           |  |        |        |                                                                                                                                                                    |     |         |                                                                                                                                                                         |     |      |          |     |        |           |  |        |        |
| <table><tr><th>No.</th><th>Size</th><th>Material</th></tr><tr><td>009</td><td>48 cm</td><td>Acrylic</td></tr><tr><td></td><td>126 cm</td><td></td></tr></table>                                                  | No.                                                                                 | Size                                                                                 | Material                                                                              | 009 | 48 cm | Acrylic   |  | 126 cm |        | <table><tr><th>No.</th><th>Size</th><th>Material</th></tr><tr><td>010</td><td>51 cm</td><td>Spandex</td></tr><tr><td></td><td>87 cm</td><td>Cotton</td></tr><tr><td></td><td></td><td>Polyester</td></tr></table>  | No. | Size      | Material                                                                                                                                                     | 010 | 51 cm | Spandex   |     | 87 cm  | Cotton |  |        | Polyester |                                                                                                                                                                                                                    |     |      |          |     |       |           |  |        |        |                                                                                                                                                                    |     |         |                                                                                                                                                                         |     |      |          |     |        |           |  |        |        |
| No.                                                                                                                                                                                                              | Size                                                                                | Material                                                                             |                                                                                       |     |       |           |  |        |        |                                                                                                                                                                                                                    |     |           |                                                                                                                                                              |     |       |           |     |        |        |  |        |           |                                                                                                                                                                                                                    |     |      |          |     |       |           |  |        |        |                                                                                                                                                                    |     |         |                                                                                                                                                                         |     |      |          |     |        |           |  |        |        |
| 009                                                                                                                                                                                                              | 48 cm                                                                               | Acrylic                                                                              |                                                                                       |     |       |           |  |        |        |                                                                                                                                                                                                                    |     |           |                                                                                                                                                              |     |       |           |     |        |        |  |        |           |                                                                                                                                                                                                                    |     |      |          |     |       |           |  |        |        |                                                                                                                                                                    |     |         |                                                                                                                                                                         |     |      |          |     |        |           |  |        |        |
|                                                                                                                                                                                                                  | 126 cm                                                                              |                                                                                      |                                                                                       |     |       |           |  |        |        |                                                                                                                                                                                                                    |     |           |                                                                                                                                                              |     |       |           |     |        |        |  |        |           |                                                                                                                                                                                                                    |     |      |          |     |       |           |  |        |        |                                                                                                                                                                    |     |         |                                                                                                                                                                         |     |      |          |     |        |           |  |        |        |
| No.                                                                                                                                                                                                              | Size                                                                                | Material                                                                             |                                                                                       |     |       |           |  |        |        |                                                                                                                                                                                                                    |     |           |                                                                                                                                                              |     |       |           |     |        |        |  |        |           |                                                                                                                                                                                                                    |     |      |          |     |       |           |  |        |        |                                                                                                                                                                    |     |         |                                                                                                                                                                         |     |      |          |     |        |           |  |        |        |
| 010                                                                                                                                                                                                              | 51 cm                                                                               | Spandex                                                                              |                                                                                       |     |       |           |  |        |        |                                                                                                                                                                                                                    |     |           |                                                                                                                                                              |     |       |           |     |        |        |  |        |           |                                                                                                                                                                                                                    |     |      |          |     |       |           |  |        |        |                                                                                                                                                                    |     |         |                                                                                                                                                                         |     |      |          |     |        |           |  |        |        |
|                                                                                                                                                                                                                  | 87 cm                                                                               | Cotton                                                                               |                                                                                       |     |       |           |  |        |        |                                                                                                                                                                                                                    |     |           |                                                                                                                                                              |     |       |           |     |        |        |  |        |           |                                                                                                                                                                                                                    |     |      |          |     |       |           |  |        |        |                                                                                                                                                                    |     |         |                                                                                                                                                                         |     |      |          |     |        |           |  |        |        |
|                                                                                                                                                                                                                  |                                                                                     | Polyester                                                                            |                                                                                       |     |       |           |  |        |        |                                                                                                                                                                                                                    |     |           |                                                                                                                                                              |     |       |           |     |        |        |  |        |           |                                                                                                                                                                                                                    |     |      |          |     |       |           |  |        |        |                                                                                                                                                                    |     |         |                                                                                                                                                                         |     |      |          |     |        |           |  |        |        |

Figure 3: Long-sleeve Shirts (Test Set)

|                                                                                   |                                                                                   |                                                                                    |                                                                                     |
|-----------------------------------------------------------------------------------|-----------------------------------------------------------------------------------|------------------------------------------------------------------------------------|-------------------------------------------------------------------------------------|
|  |  |  |  |
| <b>No.</b> <b>Size</b> <b>Material</b>                                            | <b>No.</b> <b>Size</b> <b>Material</b>                                            | <b>No.</b> <b>Size</b> <b>Material</b>                                             | <b>No.</b> <b>Size</b> <b>Material</b>                                              |
| 011   49 cm   Cotton                                                              | 012   63 cm   Spandex                                                             | 013   55 cm   Cotton                                                               | 014   60 cm   Polyester                                                             |
| 63 cm                                                                             | 70 cm   Viscose                                                                   | 83 cm                                                                              | 83 cm   Cotton                                                                      |
|  |  |  |  |
| <b>No.</b> <b>Size</b> <b>Material</b>                                            | <b>No.</b> <b>Size</b> <b>Material</b>                                            | <b>No.</b> <b>Size</b> <b>Material</b>                                             | <b>No.</b> <b>Size</b> <b>Material</b>                                              |
| 015   46 cm   Viscose                                                             | 016   66 cm   Cotton                                                              | 017   56 cm   Polyester                                                            | 018   69 cm   Cotton                                                                |
| 133 cm   Nylon                                                                    | 65 cm   Linen                                                                     | 95 cm   Cotton                                                                     | 90 cm                                                                               |
|  |  |                                                                                    |                                                                                     |
| <b>No.</b> <b>Size</b> <b>Material</b>                                            | <b>No.</b> <b>Size</b> <b>Material</b>                                            |                                                                                    |                                                                                     |
| 019   41 cm   Polyester                                                           | 020   43 cm   Polyester                                                           |                                                                                    |                                                                                     |
| 73 cm   Cotton                                                                    | 67 cm   Cotton                                                                    |                                                                                    |                                                                                     |

Figure 4: Short-sleeve T-Shirts (Test Set)

|                                                                                     |                                                                                     |                                                                                      |                                                                                       |
|-------------------------------------------------------------------------------------|-------------------------------------------------------------------------------------|--------------------------------------------------------------------------------------|---------------------------------------------------------------------------------------|
|    |    |    |    |
| <b>No.</b> <b>Size</b> <b>Material</b>                                              | <b>No.</b> <b>Size</b> <b>Material</b>                                              | <b>No.</b> <b>Size</b> <b>Material</b>                                               | <b>No.</b> <b>Size</b> <b>Material</b>                                                |
| 021 50 cm Nylon<br>144 cm                                                           | 022 53 cm Acylic<br>115 cm                                                          | 023 51 cm Cotton<br>110 cm                                                           | 024 53 cm Polyester<br>143 cm Cotton                                                  |
|    |    |    |    |
| <b>No.</b> <b>Size</b> <b>Material</b>                                              | <b>No.</b> <b>Size</b> <b>Material</b>                                              | <b>No.</b> <b>Size</b> <b>Material</b>                                               | <b>No.</b> <b>Size</b> <b>Material</b>                                                |
| 025 46 cm Polyester<br>133 cm Cotton                                                | 026 38 cm Cotton<br>141 cm                                                          | 027 57 cm Polyester<br>140 cm Cotton<br>Spandex                                      | 028 63 cm Wool<br>155 cm                                                              |
|    |    |    |    |
| <b>No.</b> <b>Size</b> <b>Material</b>                                              | <b>No.</b> <b>Size</b> <b>Material</b>                                              | <b>No.</b> <b>Size</b> <b>Material</b>                                               | <b>No.</b> <b>Size</b> <b>Material</b>                                                |
| 029 57 cm Viscose<br>128 cm Cotton<br>Spandex                                       | 030 66 cm Polyester<br>129 cm Cotton                                                | 031 70 cm Viscose<br>143 cm Nylon                                                    | 032 65 cm Viscose<br>167 cm Nylon                                                     |
|  |  |  |  |
| <b>No.</b> <b>Size</b> <b>Material</b>                                              | <b>No.</b> <b>Size</b> <b>Material</b>                                              | <b>No.</b> <b>Size</b> <b>Material</b>                                               | <b>No.</b> <b>Size</b> <b>Material</b>                                                |
| 033 57 cm Polyester<br>137 cm Cotton<br>Spandex                                     | 034 63 cm Polyester<br>151 cm Cotton<br>Spandex                                     | 035 53 cm Polyester<br>91 cm Cotton<br>Spandex                                       | 036 49 cm Cotton<br>121 cm                                                            |
|  |  |  |  |
| <b>No.</b> <b>Size</b> <b>Material</b>                                              | <b>No.</b> <b>Size</b> <b>Material</b>                                              | <b>No.</b> <b>Size</b> <b>Material</b>                                               | <b>No.</b> <b>Size</b> <b>Material</b>                                                |
| 037 53 cm Polyester<br>125 cm Nylon                                                 | 038 56 cm Polyester<br>133 cm Nylon<br>Spandex                                      | 039 66 cm Cotton<br>134 cm Nylon<br>Spandex                                          | 040 60 cm Polyester<br>142 cm                                                         |

Figure 5: Long-sleeve Shirts (Train Set)



|                                                                                     |                                                                                     |                                                                                      |                                                                                       |
|-------------------------------------------------------------------------------------|-------------------------------------------------------------------------------------|--------------------------------------------------------------------------------------|---------------------------------------------------------------------------------------|
|    |    |    |    |
| <b>No.</b> <b>Size</b> <b>Material</b>                                              | <b>No.</b> <b>Size</b> <b>Material</b>                                              | <b>No.</b> <b>Size</b> <b>Material</b>                                               | <b>No.</b> <b>Size</b> <b>Material</b>                                                |
| 041 60 cm Cotton                                                                    | 042 66 cm Viscose                                                                   | 043 59 cm Cotton                                                                     | 044 68 cm Polyester                                                                   |
| 69 cm                                                                               | 60 cm Cotton                                                                        | 75 cm                                                                                | 68 cm Nylon                                                                           |
|    |    |    |    |
| <b>No.</b> <b>Size</b> <b>Material</b>                                              | <b>No.</b> <b>Size</b> <b>Material</b>                                              | <b>No.</b> <b>Size</b> <b>Material</b>                                               | <b>No.</b> <b>Size</b> <b>Material</b>                                                |
| 045 49 cm Polyester                                                                 | 046 61 cm Cotton                                                                    | 047 55 cm Polyester                                                                  | 048 60 cm Polyester                                                                   |
| 67 cm Cotton                                                                        | 70 cm                                                                               | 65 cm Cotton                                                                         | 75 cm Cotton                                                                          |
|    |    |    |    |
| <b>No.</b> <b>Size</b> <b>Material</b>                                              | <b>No.</b> <b>Size</b> <b>Material</b>                                              | <b>No.</b> <b>Size</b> <b>Material</b>                                               | <b>No.</b> <b>Size</b> <b>Material</b>                                                |
| 049 61 cm Viscose                                                                   | 050 60 cm Viscose                                                                   | 051 66 cm Polyester                                                                  | 052 69 cm Polyester                                                                   |
| 69 cm Cotton                                                                        | 66 cm Cotton                                                                        | 78 cm Cotton                                                                         | 69 cm Cotton                                                                          |
| Spandex                                                                             | Spandex                                                                             |                                                                                      | Spandex                                                                               |
|  |  |  |  |
| <b>No.</b> <b>Size</b> <b>Material</b>                                              | <b>No.</b> <b>Size</b> <b>Material</b>                                              | <b>No.</b> <b>Size</b> <b>Material</b>                                               | <b>No.</b> <b>Size</b> <b>Material</b>                                                |
| 053 68 cm Cotton                                                                    | 054 58 cm Viscose                                                                   | 055 67 cm Polyester                                                                  | 056 53 cm Polyester                                                                   |
| 85 cm                                                                               | 78 cm Cotton                                                                        | 60 cm Cotton                                                                         | 76 cm Cotton                                                                          |
|                                                                                     | Spandex                                                                             | Spandex                                                                              |                                                                                       |
|  |  |  |  |
| <b>No.</b> <b>Size</b> <b>Material</b>                                              | <b>No.</b> <b>Size</b> <b>Material</b>                                              | <b>No.</b> <b>Size</b> <b>Material</b>                                               | <b>No.</b> <b>Size</b> <b>Material</b>                                                |
| 057 50 cm Polyester                                                                 | 058 58 cm Polyester                                                                 | 059 42 cm Spandex                                                                    | 060 61 cm Polyester                                                                   |
| 98 cm Cotton                                                                        | 67 cm Cotton                                                                        | 70 cm Cotton                                                                         | 83 cm Nylon                                                                           |
|                                                                                     | Spandex                                                                             |                                                                                      |                                                                                       |

Figure 6: Short-sleeve T-Shirts (Train Set)

## References

- [1] H. Wang, S. Sridhar, J. Huang, J. Valentin, S. Song, and L. J. Guibas. Normalized object coordinate space for category-level 6d object pose and size estimation. In *Proceedings of the IEEE/CVF Conference on Computer Vision and Pattern Recognition*, pages 2642–2651, 2019.
- [2] A. Canberk, C. Chi, H. Ha, B. Burchfiel, E. Cousineau, S. Feng, and S. Song. Cloth funnels: Canonicalized-alignment for multi-purpose garment manipulation. *arXiv preprint arXiv:2210.09347*, 2022.
- [3] H. Xue, W. Xu, J. Zhang, T. Tang, Y. Li, W. Du, R. Ye, and C. Lu. Garmenttracking: Category-level garment pose tracking. In *Proceedings of the IEEE/CVF Conference on Computer Vision and Pattern Recognition*, pages 21233–21242, 2023.
- [4] H. Bertiche, M. Madadi, and S. Escalera. Cloth3d: clothed 3d humans. In *Computer Vision—ECCV 2020: 16th European Conference, Glasgow, UK, August 23–28, 2020, Proceedings, Part XX 16*, pages 344–359. Springer, 2020.
- [5] L. A. Thiede and P. P. Brahma. Analyzing the variety loss in the context of probabilistic trajectory prediction. In *Proceedings of the IEEE/CVF International Conference on Computer Vision*, pages 9954–9963, 2019.
